# Supplementary material for: Adipose Tissue Caveolin-1 Upregulation in Obesity Involves TNF-α/NF-κB Mediated Signaling
Source: Cells. 2023 Mar 27;12(7):1019. doi: 10.3390/cells12071019 (PMC10093236; doi:10.3390/cells12071019)
Supplement: Supplementary file 1 [file cells-12-01019-s001.zip › cells-2091670-supplementary.pdf]

Supplementary Materials

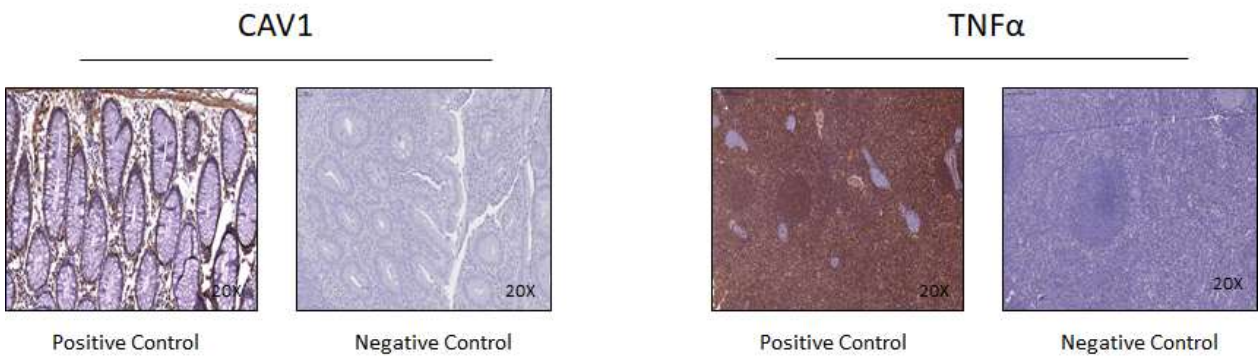

**Figure S1.** Caveolin-1 (CAV1) and TNF- $\alpha$  antibodies specificity validation using spleen tissues.

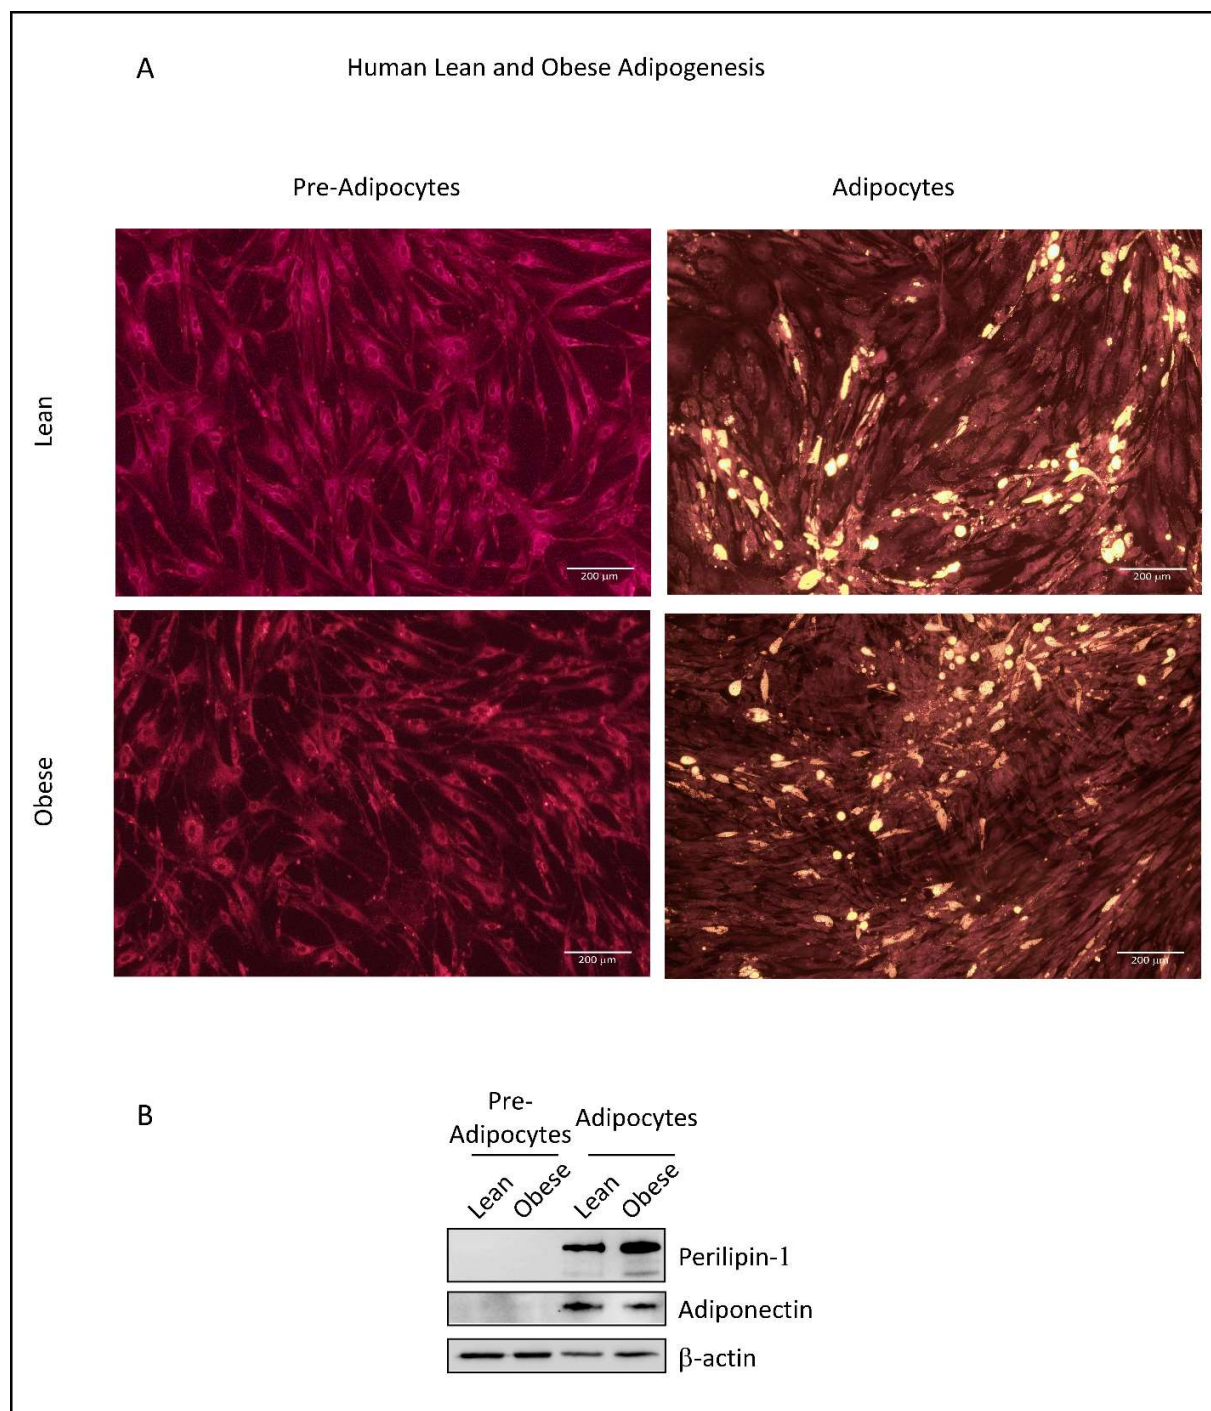

**Figure S2.** Human pre-adipocytes were differentiated into adipocytes. **(A)** Adipocytes were monitored for lipid droplet appearance in the cytoplasm using Nile Red staining (Magnification 100 $\times$ ). **(B)** The differentiation authenticity was detected by Western blot assays using antibodies against the adipocyte's markers.

**Table S1.** List of TaqMan Assays used for RT-PCR.

| <b>Primer List</b> | <b>Assay ID</b> | <b>Primer List</b> | <b>Assay ID</b> |
|--------------------|-----------------|--------------------|-----------------|
| IL-2               | Hs00174114_m1   | CXCL9              | Hs00171065_m1   |
| IL-5               | Hs01548712_g1   | CXCL10             | Hs01124251_g1   |
| IL-6               | Hs00985639_m1   | CXCL11             | Hs04187682_g1   |
| IL-8               | Hs00174103_m1   | TLR2               | Hs01822448_m1   |
| IL-10              | Hs00961622_m1   | TLR3               | Hs01551078_m1   |
| IL-12A             | Hs01073447_m1   | TLR4               | Hs00152939_m1   |
| IL-13              | Hs00174379_m1   | TLR7               | Hs01933259_s1   |
| IL23A              | Hs00900828_g1   | TLR8               | Hs07292888_s1   |
| IL1RL1             | Hs00545033_m1   | TLR9               | Hs00370913_s1   |
| IL2RA              | Hs00907779_m1   | TLR10              | Hs01935337_s1   |
| CCL2               | Hs00234140_m1   | IRF4               | Hs00180031_m1   |
| CCL3               | Hs04194942_s1   | CD16               | Hs04334165_m1   |
| CCL8               | Hs04187715_m1   | CD68               | Hs02836816_g1   |
| CCL15              | Hs00361122_m1   | CD86               | Hs01567026_m1   |
| CCL18              | Hs00268113_m1   | CD163              | Hs00174705_m1   |
| CCR1               | Hs00928897_s1   | NF- $\kappa$ B     | Hs00765730_m1   |
| CCR2               | Hs00704702_s1   | TNF- $\alpha$      | Hs01113624_g1   |
| GAPDH              | Hs03929097_g1   | Caveolin 1         | Hs00971716_m1   |
| Mouse Caveolin-1   | Mm00483057_m1   |                    |                 |
